# Supplementary material for: Prevalence of other autoimmune diseases in polyglandular autoimmune syndromes type II and III
Source: PubMed Central journal article supplement (PMC7431444; doi:10.1007/s40618-020-01229-1), 2020-08-17
Supplement: 40618_2020_1229_MOESM1_ESM.pdf [file 40618_2020_1229_MOESM1_ESM.pdf]

|                |      | Is the objective of the study stated clearly in the abstract, introduction, or methods section? | Are the characteristics of the participants included in the study described? | Were the cases collected in more than one centre? | Are the eligibility criteria (inclusion and exclusion criteria) for entry into the study explicit and appropriate? | Were participants recruited consecutively? | Did participants enter the study at a similar point in the disease? | Is the cases described with sufficient details to allow other investigators to replicate the research or to allow practitioners make inferences related to their own practice? |
|----------------|------|-------------------------------------------------------------------------------------------------|------------------------------------------------------------------------------|---------------------------------------------------|--------------------------------------------------------------------------------------------------------------------|--------------------------------------------|---------------------------------------------------------------------|--------------------------------------------------------------------------------------------------------------------------------------------------------------------------------|
| Abrar-Ahmad    | 2014 | *                                                                                               | *                                                                            | *                                                 | *                                                                                                                  | *                                          |                                                                     |                                                                                                                                                                                |
| Ben-Skowronek  | 2013 | *                                                                                               | *                                                                            |                                                   | *                                                                                                                  | *                                          | *                                                                   | *                                                                                                                                                                              |
| Betterle       | 2001 | *                                                                                               | *                                                                            |                                                   | *                                                                                                                  | *                                          | *                                                                   | *                                                                                                                                                                              |
| Choudhuri      | 2005 |                                                                                                 | *                                                                            |                                                   | *                                                                                                                  | *                                          |                                                                     |                                                                                                                                                                                |
| Cruz           | 2007 | *                                                                                               | *                                                                            |                                                   | *                                                                                                                  | *                                          | *                                                                   | *                                                                                                                                                                              |
| Dittmar        | 2003 | *                                                                                               | *                                                                            |                                                   | *                                                                                                                  | *                                          |                                                                     | *                                                                                                                                                                              |
| Handa          | 2003 | *                                                                                               | *                                                                            |                                                   |                                                                                                                    | *                                          | *                                                                   | *                                                                                                                                                                              |
| Horie          | 2012 | *                                                                                               | *                                                                            |                                                   | *                                                                                                                  |                                            | *                                                                   | *                                                                                                                                                                              |
| Karagüzel      | 2008 | *                                                                                               | *                                                                            |                                                   | *                                                                                                                  | *                                          |                                                                     | *                                                                                                                                                                              |
| Karavanaki     | 2009 | *                                                                                               | *                                                                            |                                                   | *                                                                                                                  | *                                          | *                                                                   | *                                                                                                                                                                              |
| Kondonouri     | 2002 | *                                                                                               | *                                                                            | *                                                 | *                                                                                                                  | *                                          |                                                                     |                                                                                                                                                                                |
| Papadopoulos   | 1990 | *                                                                                               | *                                                                            |                                                   | *                                                                                                                  | *                                          | *                                                                   | *                                                                                                                                                                              |
| Papadopoulos   | 1996 | *                                                                                               | *                                                                            | *                                                 | *                                                                                                                  | *                                          | *                                                                   |                                                                                                                                                                                |
| Piatkowska     | 2011 | *                                                                                               | *                                                                            |                                                   |                                                                                                                    | *                                          |                                                                     | *                                                                                                                                                                              |
| Renzullo       | 2013 |                                                                                                 | *                                                                            |                                                   | *                                                                                                                  | *                                          | *                                                                   | *                                                                                                                                                                              |
| Sastre-Garriga | 2000 | *                                                                                               |                                                                              |                                                   | *                                                                                                                  | *                                          | *                                                                   |                                                                                                                                                                                |
| Storz          | 2011 | *                                                                                               | *                                                                            | *                                                 | *                                                                                                                  | *                                          |                                                                     | *                                                                                                                                                                              |
| Teufel         | 2010 | *                                                                                               | *                                                                            |                                                   | *                                                                                                                  | *                                          | *                                                                   | *                                                                                                                                                                              |

Supplementary table. 1. Quality assesment of the included studies

| First Author   | Year of publication | Design               | Country             | Number of patients |         | Age in APS |       |       | Sex in APS |      |
|----------------|---------------------|----------------------|---------------------|--------------------|---------|------------|-------|-------|------------|------|
|                |                     |                      |                     | APS                | not APS | Mean       | SD    | range | Female     | Male |
| Abrar-Ahmad    | 2014                | Case series          | France              | 21                 | 7       | NA         | NA    | NA    | NA         | NA   |
| Ben-Skowronek  | 2013                | Case series          | Poland              | 67                 | 394     | NA         | NA    | NA    | 51         | 16   |
| Betterle       | 2001                | Retrospective review | Italy               | 100                | 147     | NA         | NA    | NA    | NA         | NA   |
| Choudhuri      | 2005                | Retrospective review | India               | 41                 | 0       | 36,3       | 2,6   | 7-68  | 34         | 7    |
| Cruz           | 2007                | Retrospective review | Brazil              | 254                | 0       | 39,32      | 13,48 | NA    | 203        | 51   |
| Dittmar        | 2003                | Retrospective review | Germany             | 151                | 0       | NA         | NA    | NA    | 114        | 37   |
|                |                     |                      |                     | 83                 | 388     | 48,2       | 19,1  | NA    | 53         | 30   |
| Handa          | 2003                | Retrospective review | India               | 5                  | 620     | NA         | NA    | NA    | NA         | NA   |
| Horie          | 2012                | Retrospective review | Japan               | 54                 | 143     | NA         | NA    | NA    | 44         | 10   |
| Karagüzel      | 2008                | Cohort study         | Turkey              | 5                  | 52      | NA         | NA    | NA    | NA         | NA   |
| Karavanaki     | 2009                | Retrospective review | Greece              | 24                 | 120     | NA         | NA    | NA    | NA         | NA   |
| Kondonouri     | 2002                | Retrospective review | Germany and Austria | 210                | 17539   | 13,6       | 3,8   | NA    | NA         | NA   |
| Papadopoulos   | 1990                | Retrospective review | Sweden              | 22                 | 22      | 35         | NA    | 18-61 | 16         | 6    |
| Papadopoulos   | 1996                | Retrospective review | Sweden              | 15                 | 63      | 57         | NA    | 26-78 | 8          | 7    |
| Piatkowska     | 2011                | Retrospective review | Poland              | 55                 | 327     | 11,31      | 3,74  | NA    | 36         | 19   |
| Renzullo       | 2013                | Retrospective review | Italy               | 17                 | 98      | 52         | 7     | NA    | 17         | 0    |
| Sastre-Garriga | 2000                | Retrospective review | Spain               | 2                  | 1275    | NA         | NA    | 28-37 | 1          | 1    |
| Storz          | 2011                | Retrospective review | Germany             | 75                 | 75      | 47,51      | 15,3  | NA    | 49         | 26   |
| Teufel         | 2010                | Retrospective review | Germany             | 111                | 167     | NA         | NA    | NA    | NA         | NA   |

Table 2. Characteristics of the included studies (NA= not available)
